# Supplementary material
Source: PubMed Central journal article supplement (PMC4072498)
Supplement: NIHMS599051-supplement-01.pdf [file NIHMS599051-supplement-01.pdf]

**Figure S1 (related to Figure 1)**

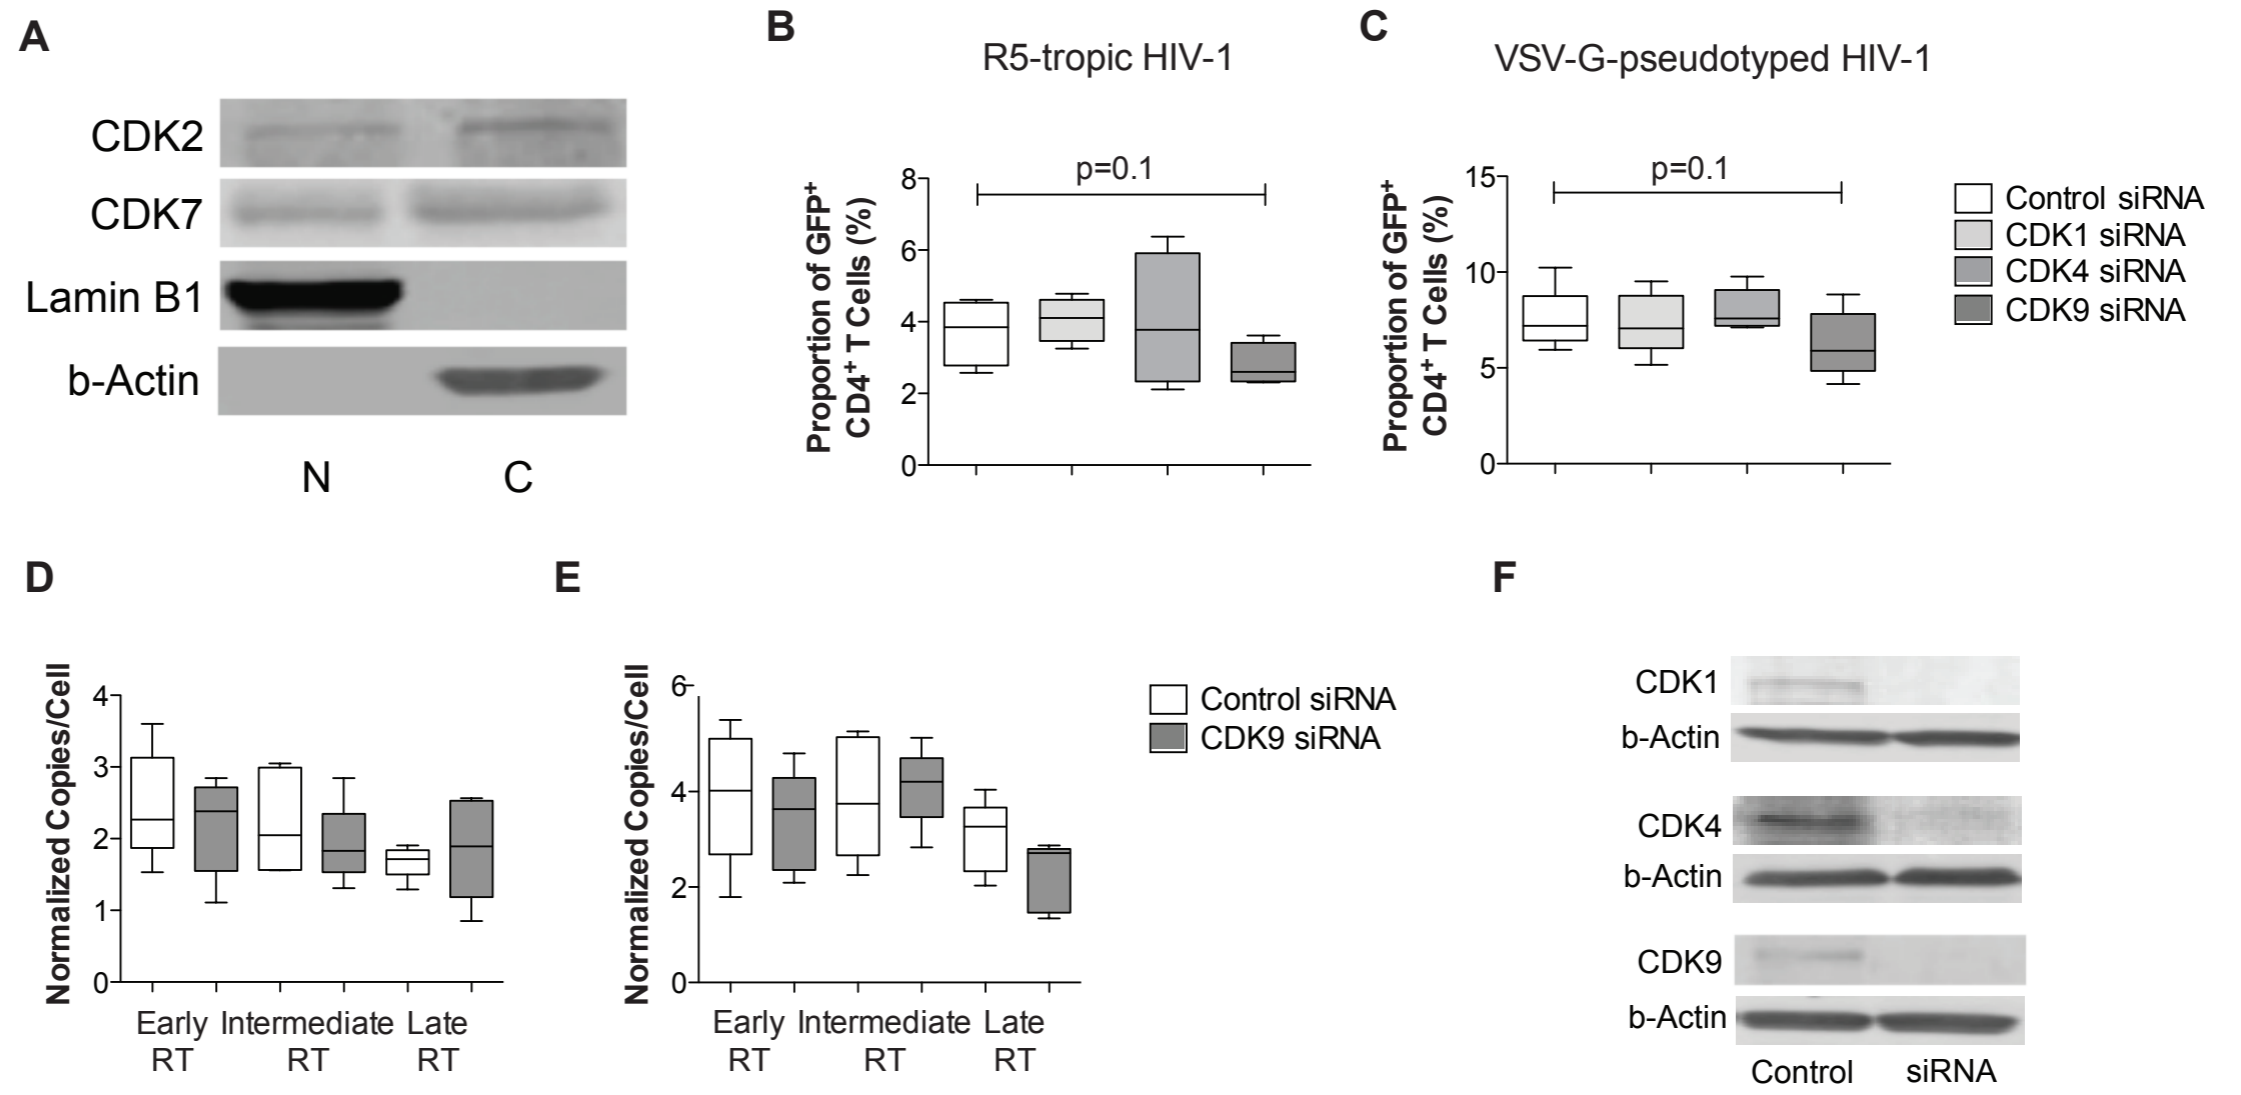

**Figure S2 (related to Figure 2)**

**A**

HIV Reverse Transcriptase

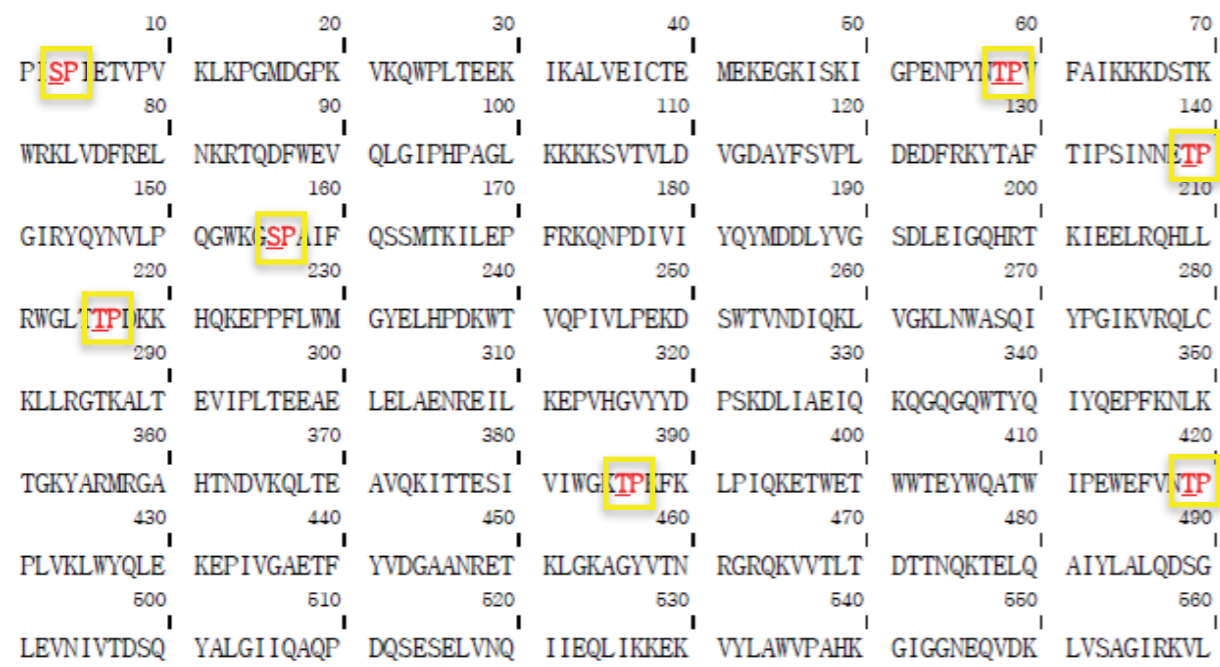

**B**

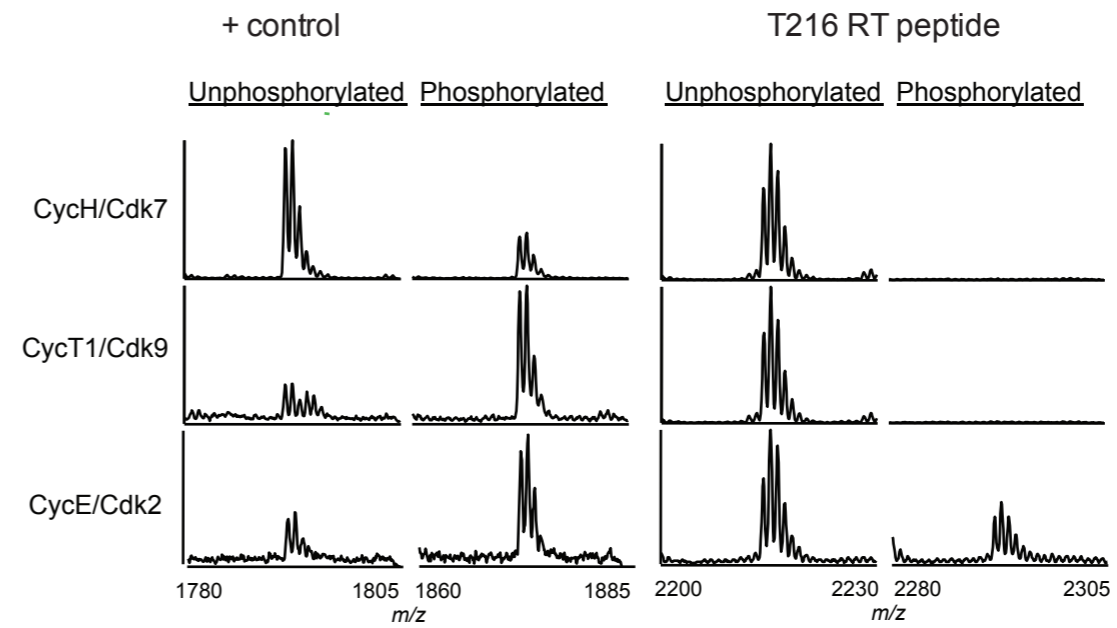

**C**

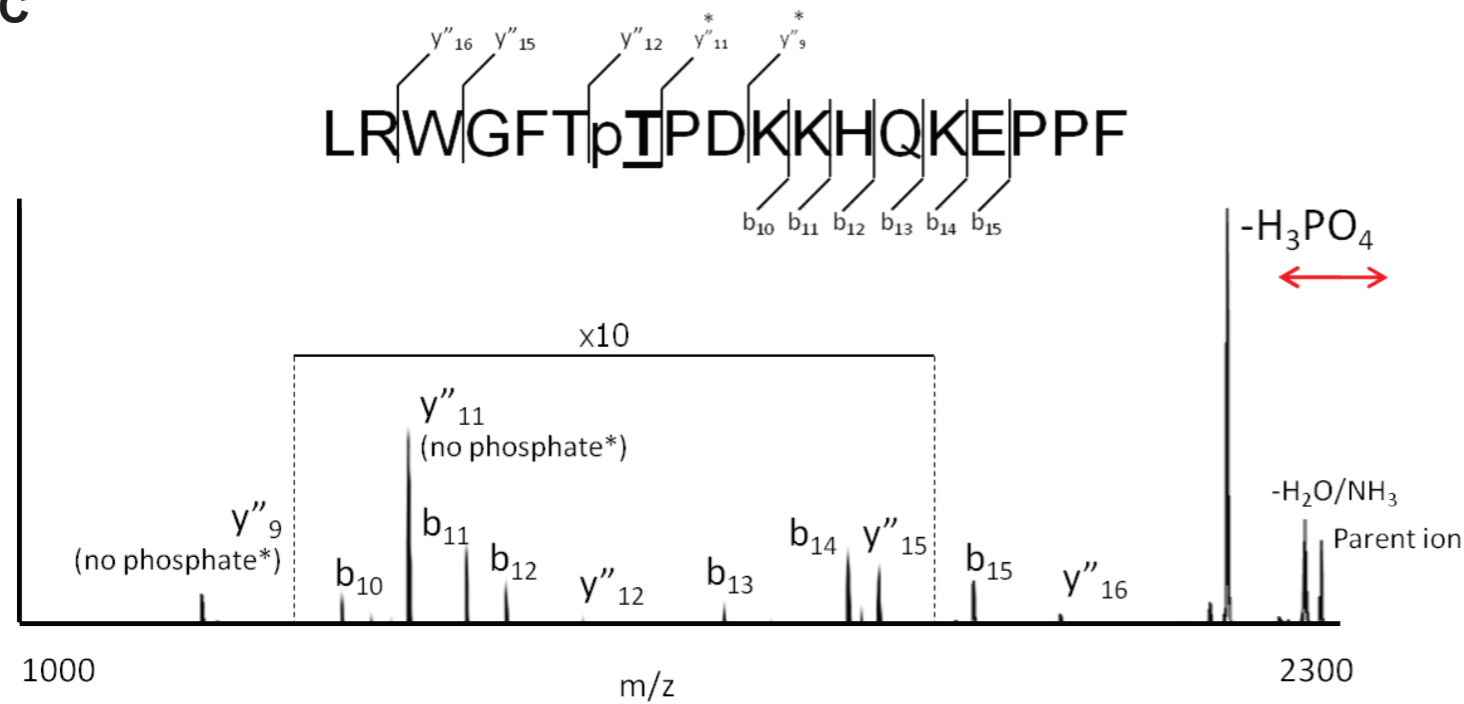

| Ion   | m/z     | Sequence          |
|-------|---------|-------------------|
| y''9  | 1138.68 | KKHQKEPPF         |
| y''11 | 1350.71 | PDKKHQKEPPF       |
| b10   | 1282.62 | LRWGFTpTPDK       |
| b11   | 1410.72 | LRWGFTpTPDKK      |
| b12   | 1547.78 | LRWGFTpTPDKKH     |
| y''12 | 1531.76 | pTPDKKKHQKEPPF    |
| b13   | 1675.83 | LRWGFTpTPDKKHQ    |
| b14   | 1803.93 | LRWGFTpTPDKKHQK   |
| y''15 | 1836.90 | GFTpTPDKKHQKEPPF  |
| b15   | 1932.97 | LRWGFTpTPDKKHQKE  |
| y''16 | 2022.98 | WGFTpTPDKKHQKEPPF |

**D**

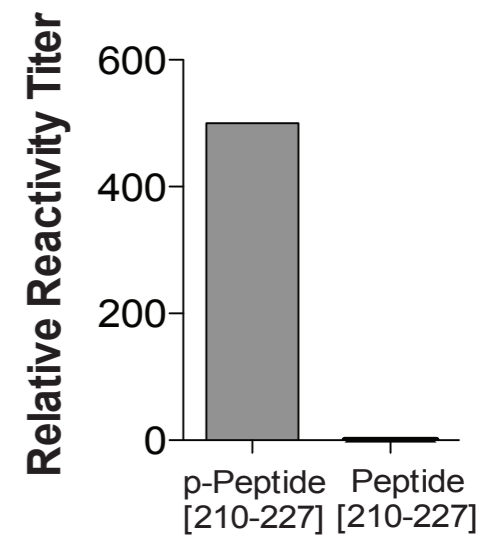

**E**

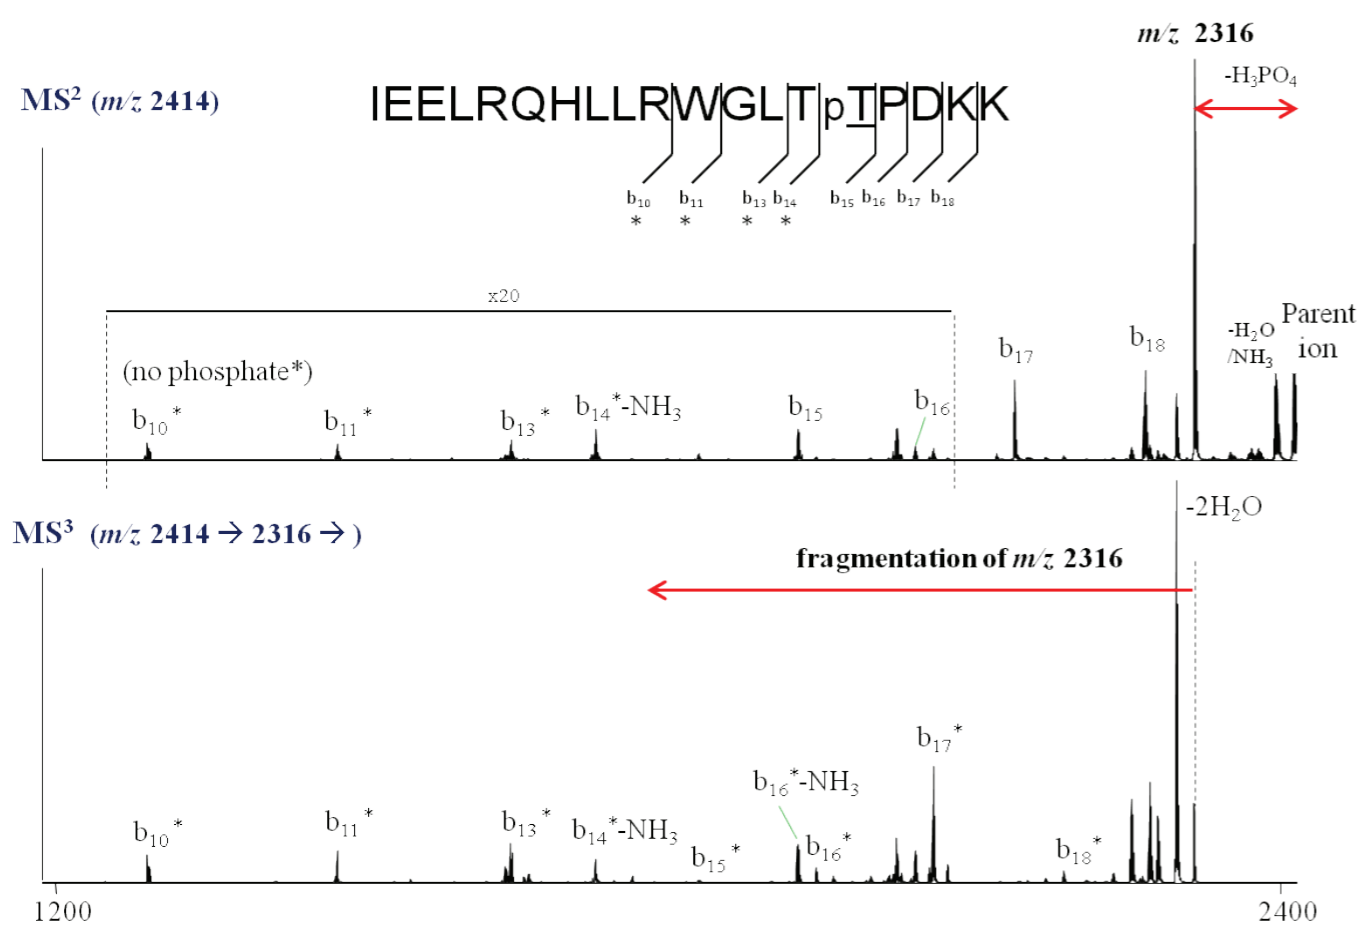

|      |         | MS <sup>2</sup>    |      |         | MS <sup>3</sup>    |
|------|---------|--------------------|------|---------|--------------------|
| Ion  | m/z     | Sequence           | Ion  | m/z     | Sequence           |
| b10* | 1288.74 | IEELRQHLLR         | b10* | 1288.74 | IEELRQHLLR         |
| b11* | 1474.82 | IEELRQHLLRW        | b11* | 1474.82 | IEELRQHLLRW        |
| b13* | 1644.92 | IEELRQHLLRWGL      | b13* | 1644.92 | IEELRQHLLRWGL      |
| b14* | 1745.97 | IEELRQHLLRWGLT     | b14* | 1745.97 | IEELRQHLLRWGLT     |
| b15  | 1847.02 | IEELRQHLLRWGLTTP   | b15* | 1767.02 | IEELRQHLLRWGLTT    |
| b16  | 1944.07 | IEELRQHLLRWGLTTP   | b16* | 1864.07 | IEELRQHLLRWGLTTP   |
| b17  | 2059.10 | IEELRQHLLRWGLTTPD  | b17* | 1979.10 | IEELRQHLLRWGLTTPD  |
| b18  | 2187.19 | IEELRQHLLRWGLTTPDK | b18* | 2107.19 | IEELRQHLLRWGLTTPDK |

**Figure S3 (related to Figure 4)**

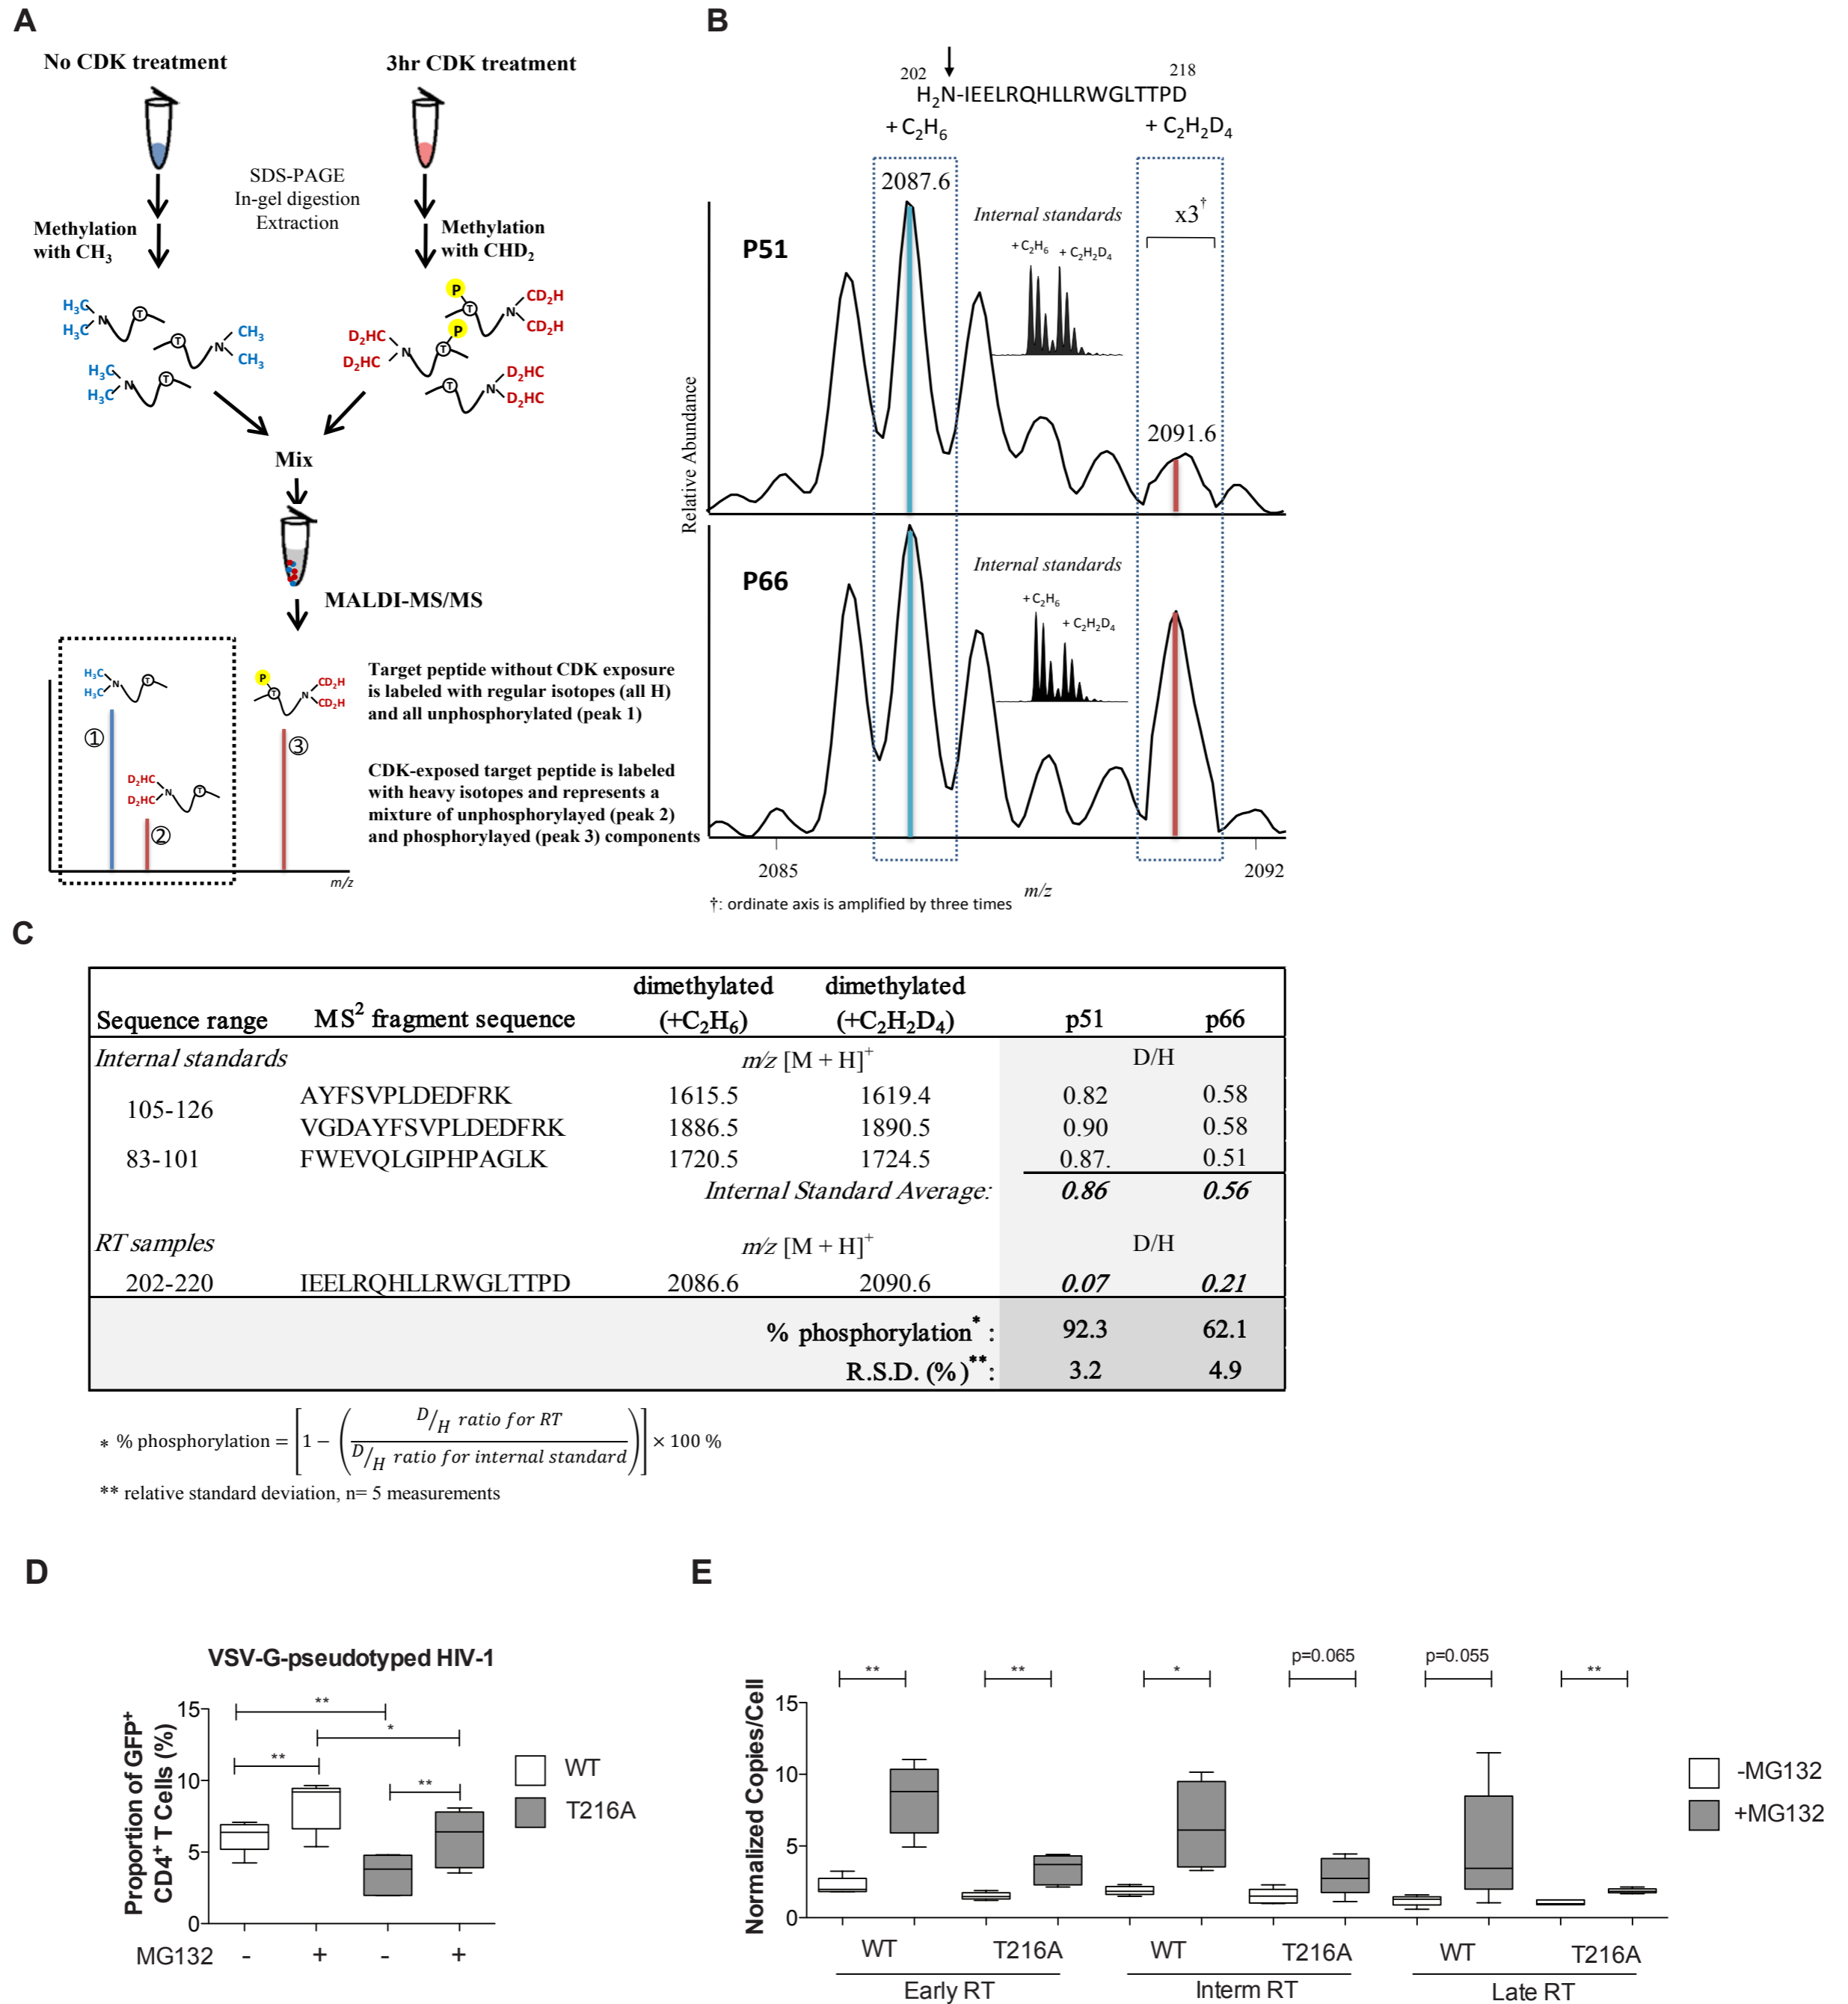

**Figure S4 (related to Figure 5)**

**A**

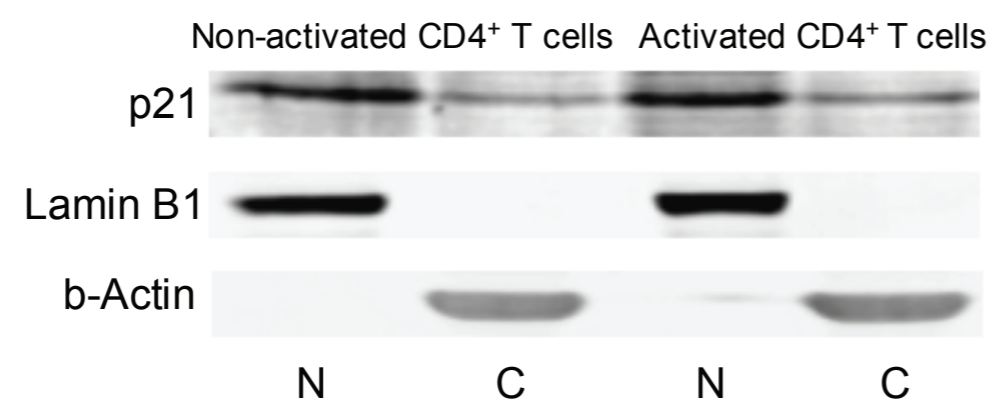

**B**

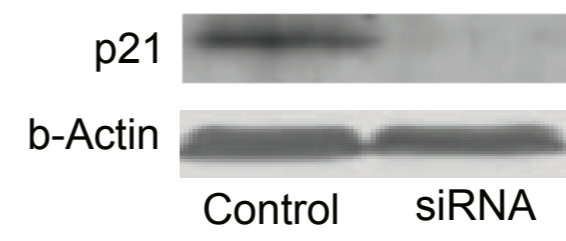

## Supplemental figure legends

**Supplemental Figure 1 (related to Figure 1): Host CDK2 supports HIV-1 reverse transcription.** (A): Subcellular localization of CDK2 and CDK7 in activated CD4<sup>+</sup> T cells. Nuclear (“N”) and cytoplasmic (“C”) protein fractions were isolated from activated CD4<sup>+</sup> T cells. Western blots using antibodies directed against CDK2 and CDK7 are shown. Lamin B1 and b-Actin were used as controls for nuclear and cytoplasmic proteins, respectively. (B-C): Infection of CD4<sup>+</sup> T cells from HIV-1 negative persons with R5-tropic (B) or VSV-G-pseudotyped (C) HIV-1 in the presence of indicated siRNA. (D-E): Analysis of HIV-1 reverse transcripts in CD4<sup>+</sup> T cells infected with R5-tropic (D) or VSV-G pseudotyped (E) HIV-1 after experimental knock-down of CDK9. (F): Detection of CDK1, CDK4 and CDK9 in CD4<sup>+</sup> T cells by western blots after siRNA-mediated silencing of the respective genes.

**Supplemental Figure 2 (related to Figure 2): HIV-1 RT is a substrate for CDK2-dependent phosphorylation.** (A): Seven minimal CDK phosphorylation consensus motifs (S/T)P are highlighted in red in the HIV-1 RT sequence. (B): *In vitro* phosphorylation reaction of synthetic peptide [210-227] by cyclin-dependent kinases. The peptide [210-227] was incubated with ATP and cyclinH/CDK7, cyclinT1/CDK9, or cyclinE/CDK2 for 3 hours, and assayed by MALDI-selected ion monitoring mass spectrometry. Phosphorylation is not observed for CDK7 or CDK9. Dyrktide was used as a positive control. (C): MS<sup>2</sup> spectrum of the phosphorylated synthetic peptide [210-227] analyzed using MALDI-LTQ-MS. MS<sup>2</sup> fragmentation reveals a strong neutral loss of 98 *m/z* units, corresponding to phosphoric acid, characteristic of Ser/Thr phosphorylated peptide ions (McLachlin and Chait, 2001). The signals with *m/z* of the backbone fragmentation indicated that the underlined Threonine residue is phosphorylated. b ions indicate N-terminal peptide fragments and y'' ions indicate C-terminal peptide fragments, both with cleavage at the peptide bond (Biemann, 1990). Phosphate observed in the y''<sub>11</sub> but not the y''<sub>12</sub> ion indicates the phosphate group is on the Threonine in the seventh, not the sixth, position in the sequence, which corresponds to Thr216 in the RT sequence. (D): Selective recognition of the phosphorylated HIV-1 RT [210-227] peptide by custom-

made, rabbit-derived antibodies. Rabbits were immunized with the phosphorylated RT [210-227] peptide, and antibodies reactive with the target peptide were purified according to standard procedures, followed by negative absorption with the unphosphorylated RT [210-227] peptide. Purity of isolated phospho-specific antibody was tested by indirect Elisa assays against the phosphorylated or unphosphorylated [210-227] RT peptides bound individually to solid phase columns. Elutions from both columns were selectively tested for reactivity with the phosphorylated RT [210-227] peptide. Relative reactivity titers of the eluents from each column with the phosphorylated RT [210-227] peptide are indicated. (E): MS<sup>2</sup> and MS<sup>3</sup> spectra of Thr216 [202-220] phosphorylated Lys-C proteolytic RT peptide. In MS<sup>2</sup> spectrum, a strong neutral loss of phosphoric acid indicated the presence of phosphate, and the minor peaks representing backbone fragmentation showed the phosphorylation occurs on the underlined Threonine (in the CDK motif). *m/z* consistent with phosphorylation on the b<sub>15</sub> ion but not the b<sub>14</sub> ion indicates that the phosphate group is on the Threonine at the 15<sup>th</sup> position, which corresponds to Thr216 in the RT sequence. MS<sup>3</sup> fragmentation of *m/z* 2316 (loss of phosphate in MS<sup>2</sup>) confirmed the sequence of phosphorylated peptide, by presenting backbone fragmentation consistent with the 202-220 peptide, but without phosphate addition.

**Supplemental Figure 3 (related to Figure 4): CDK2-dependent phosphorylation increases function and stability of HIV-1 RT.** (A-C): HIV Quantification of in vitro phosphorylation of HIV-1 RT. (A): Relative quantification of specific chemical species in two samples can be achieved by using stable isotope labeling in conjunction with mass spectrometry (Oda et al., 1999; Pan and Aebersold, 2007). This requires that one sample be chemically modified with a heavy, stable isotope-containing chemical group, while the second sample be modified with the same chemical group that contains only regular isotopes. The two samples are then mixed. Mass spectrometry can distinguish the heavy isotope species from the first sample, and the corresponding regular isotope species from the second sample. The relative amounts of that species are then simply obtained from the heavy:light peak intensity ratio. In this experiment, isotope is introduced as deuterated methyl groups after in-gel proteolysis. Free amines from lysine side chains and peptide

N-termini are dimethylated either with regular hydrogen-containing methyl groups (2 x CH<sub>3</sub>, for the unphosphorylated sample) or with doubly-deuterated methyl groups (2 x CD<sub>2</sub>H, for the phosphorylated sample). The regular isotope-labeled unphosphorylated RT peptides are then mixed with the heavy isotope-labeled phosphorylated RT peptides, and subjected to MALDI-MS analysis. Relative quantification of T216 phosphorylation is determined by measuring the decrease in the abundance of unphosphorylated proteolytic peptide fragment ion spanning residues 202-218. (B) Peak intensity of the unphosphorylated T216-containing peptide is decreased for deuterated, Cdk-treated RT (red bar,  $m/z = 2091.6$ ) relative to regular, RT with no kinase treatment (blue bar,  $m/z = 2087.6$ ). These measurements are obtained from the b<sub>17</sub> fragment ion spanning RT residues 202-218 arising from the MS<sup>2</sup> fragmentation of Lys-C proteolytic peptide spanning residues 202-220. The MS<sup>2</sup> fragment ions are used to increase specificity and decrease chemical noise. Quantitative results are derived as the second isotope after deconvolving the overlapping isotope distributions of the H- and D-containing peptides. Similar results are obtained for other, less intense fragment ions of the same parent peptide (not shown). Internal standard spectra (inset) are used to correct for potential differences in peptide recovery. (C) Dimethyl-based stable isotope is used to determine *in vitro* phosphorylation stoichiometry for the p51 and p66 subunits of HIV-RT. (D-E): HIV-1 infection in the presence of proteasome inhibitors. (D): Infection of CD4<sup>+</sup> T cells from HIV-1 negative persons with VSV-G-pseudotyped HIV-1 in the presence or absence of proteasome inhibitors (MG132). (E): Corresponding analysis of HIV-1 reverse transcripts after infection of CD4<sup>+</sup> T cells in the presence or absence of MG132.

**Supplemental Figure 4 (related to Figure 5): Inhibition of p21 (waf-1/cip-1) increases HIV-1 reverse transcription in CD4<sup>+</sup> T cells from elite controllers.** (A): Subcellular localization of p21 in non-activated CD4<sup>+</sup> and activated CD4<sup>+</sup> T cells. Detection of p21 in nuclear (“N”) and cytoplasmic (“C”) protein fractions from non-activated CD4<sup>+</sup> and activated CD4<sup>+</sup> T cells by western blots. Lamin B1 and b-Actin were used as controls. (B): Efficacy of p21 siRNA-mediated gene silencing. Detection of p21 protein in CD4<sup>+</sup> T cells after siRNA-mediated silencing of the respective gene. b-Actin was used as control.

## References

Biemann, K. (1990). Appendix 5. Nomenclature for peptide fragment ions (positive ions). *Methods Enzymol* 193, 886-887.

McLachlin, D.T., and Chait, B.T. (2001). Analysis of phosphorylated proteins and peptides by mass spectrometry. *Curr Opin Chem Biol* 5, 591-602.

Oda, Y., Huang, K., Cross, F.R., Cowburn, D., and Chait, B.T. (1999). Accurate quantitation of protein expression and site-specific phosphorylation. *Proc Natl Acad Sci U S A* 96, 6591-6596.

Pan, S., and Aebersold, R. (2007). Quantitative proteomics by stable isotope labeling and mass spectrometry. *Methods Mol Biol* 367, 209-218.
